# Supplementary material for: Correlation between the structural change and the electrical transport properties of indium nitride under high pressure
Source: Royal Society of Chemistry journal article supplement (doi:10.1039/c7cp05105k), 2017-01-01
Supplement: c7cp05105k1.pdf [file c7cp05105k1.pdf]

## **Correlation between structural change and electrical transport properties of indium nitride under high pressure**

Junkai Zhang,<sup>ab</sup> Ji Qi,<sup>a</sup> Yanzhang Ma,<sup>c</sup> Tingjing Hu,<sup>a</sup> Jiejuan Yan,<sup>d</sup> Feng Ke,<sup>d</sup> Xiaoyan Cui,<sup>a</sup> Yang Gao,<sup>e</sup> Meiling Sun,<sup>\*be</sup> and Chunxiao Gao<sup>\*b</sup>

<sup>a</sup>*Key Laboratory of Functional Materials Physics and Chemistry of the Ministry of Education, Jilin Normal University,*

*Siping, 136000, China*

<sup>b</sup>*State Key Laboratory of Superhard Materials, Jilin University, Changchun, 130012, China*

<sup>c</sup>*Department of Mechanical Engineering, Texas Tech University, Lubbock, TX 79409, USA*

<sup>d</sup>*Center for High Pressure Science and Technology Advanced Research, Shanghai, 201203, China*

<sup>e</sup>*School of Physics and Optoelectronic Engineering, Shandong University of Technology, Zibo, 255000, China*

To whom correspondence should be addressed. E-mail: [cc060109@qq.com](mailto:cc060109@qq.com) and [sunml@sdut.edu.cn](mailto:sunml@sdut.edu.cn)

## Supplementary Information for Publication

Table S1. Values of  $E_g$  and  $dE_g/dP$  for the different candidate phases of InN and the phase transition pressures. B1, B2, and B3 represent the rocksalt, wurtzite, and zinc-blende phase of InN, respectively.

| Compound   | Phase | Pressure (GPa)     | $E_g$ (eV)   |                                                              | $dE_g/dP$ (meV/GPa) |                                       |
|------------|-------|--------------------|--------------|--------------------------------------------------------------|---------------------|---------------------------------------|
|            |       |                    | Present work | other calculation                                            | Present work        | other calculation                     |
|            | B3    | 0                  |              | 0.0 <sup>a,b,c</sup>                                         |                     | 19.94 <sup>c</sup>                    |
|            |       |                    |              | 0.02 <sup>d</sup>                                            |                     | 16.0 <sup>d</sup>                     |
|            |       |                    |              | 0.5813 <sup>e</sup>                                          |                     |                                       |
|            |       |                    |              | 0.753 <sup>e</sup> , 0.75 <sup>f</sup>                       |                     | 34.0 <sup>c</sup>                     |
|            | B2    | 0                  | <b>0.08</b>  |                                                              | <b>16.5</b>         |                                       |
|            |       |                    |              | -0.354 <sup>g</sup> , -0.18 <sup>h</sup> ,                   |                     | 23.4 <sup>g</sup>                     |
|            |       |                    |              | -0.160 <sup>i</sup> , -0.118 <sup>g</sup>                    |                     |                                       |
|            |       |                    |              | 0.00 <sup>i</sup> , 0.03 <sup>h</sup>                        |                     |                                       |
|            |       |                    |              |                                                              |                     | 21.0 <sup>j</sup>                     |
|            |       |                    |              | 0.26 <sup>d</sup> , 0.694 <sup>g</sup>                       |                     | 33.0 <sup>d</sup> , 31.0 <sup>g</sup> |
|            |       |                    |              | 0.711 <sup>g</sup>                                           |                     | 26.1 <sup>g</sup>                     |
|            |       |                    |              | 0.772 <sup>i</sup> , 0.805 <sup>g</sup>                      |                     | 34.0 <sup>g</sup>                     |
| <b>InN</b> | B1    | 0                  |              | 0.0573 <sup>e</sup> , 0.22 <sup>a</sup> , 0.372 <sup>k</sup> |                     | 9.4 <sup>e</sup>                      |
|            |       |                    |              | 0.6153 <sup>e</sup>                                          |                     | 64.7 <sup>e</sup>                     |
|            |       |                    |              | 0.6887 <sup>e</sup>                                          |                     |                                       |
|            |       |                    |              | 0.7438 <sup>e</sup>                                          |                     | 44.7 <sup>e</sup>                     |
|            | B3-B1 | 10.0               |              | 0.00 <sup>a</sup> , 0.081 <sup>l</sup>                       |                     |                                       |
|            |       | 10.5 <sup>k</sup>  |              |                                                              |                     |                                       |
|            |       | 11.84 <sup>m</sup> |              |                                                              |                     |                                       |
|            | B2-B1 | 10.0               | <b>0.28</b>  |                                                              | <b>33.0</b>         |                                       |
|            |       | 10.2               |              | 0.4 <sup>n</sup>                                             |                     | 18.0 <sup>n</sup>                     |
|            |       | 10.86 <sup>m</sup> |              |                                                              |                     |                                       |

|  |  |      |  |                                                                 |  |                   |
|--|--|------|--|-----------------------------------------------------------------|--|-------------------|
|  |  | 11.1 |  | 0.75 <sup>k</sup>                                               |  | 24.9 <sup>k</sup> |
|  |  | 13.0 |  | 0.1803 <sup>e</sup> , 1.3249 <sup>e</sup> , 1.4571 <sup>e</sup> |  |                   |
|  |  | 16.0 |  |                                                                 |  | 22.0 <sup>o</sup> |
|  |  | 21.6 |  | 1.66 <sup>d</sup>                                               |  | 41.0 <sup>d</sup> |

<sup>a</sup>Plane wave self-consistent method with GGA-PBE (Ref. 1).

<sup>b</sup>FP-LAPW method with MBJLDA (modified Becke-Johnson exchange potential+LDA) (Ref. 2).

<sup>c</sup>FPLAPW method with LDA (Ref. 3).

<sup>d</sup>Self-consistent LMTO method with LDA-ASA (Ref. 4).

<sup>e</sup>PAW method with HSE06, GW, and GGA, respectively (Ref. 5).

<sup>f</sup>PW-PP method with LDA+ HGH (Ref. 6).

<sup>g</sup>PAW method with PBE, HSE06, G<sub>0</sub>W<sub>0</sub>(HSE06), scGW<sub>0</sub>, G<sub>0</sub>W<sub>0</sub>(PBE), and GGA, respectively (Ref. 7).

<sup>h</sup>PAW method with LDA+U (Ref. 8).

<sup>i</sup>PAW method with GGA, GGA+U, and HSE, respectively (Ref. 9).

<sup>j</sup>LAPW method with LDA (Ref. 10).

<sup>k</sup>Troullier-Martins pseudopotentials, DFT-LDA (Ref. 11).

<sup>l</sup>FP-LAPW method with GGA-EV (Ref. 12).

<sup>m</sup>DFT with both LDA and GGA (Ref. 13).

<sup>n</sup>Plane wave pseudopotential with LDA (Ref. 14).

<sup>o</sup>Plane wave basis and with pseudopotentials, LDA+U (Ref. 15).

## References

- 1 J. M. Panchal, M. Joshi, P. N. Gajjar, *Phase Transitions*, 2016, **89**, 1-27.
- 2 M. I. Ziane, Z. Bensaad, B. Labdelli, H. Bennacer, *Sensors Transducers*, 2014, **27**, 374-384.
- 3 S. Berrah, H. Abid, A. Boukortt, M. Sehil, *Turk J Phys.*, 2006, **30**, 513-518.
- 4 N. E. Christensen, I. Gorczyca, *Phys. Rev. B*, 1994, **50**, 4397-4415.
- 5 Alvarado, Andrew Michael, High-Pressure Properties of Several Narrow Band gap Semiconductors from First-Principles Calculations, 2016, UNLV *Theses, Dissertations, Professional Papers, and Capstones*. 2629.
- 6 S. Q. Wang, H. Q. Ye, *J. Phys.: Condens. Matt.*, 2002, **14**, 9579-9587.

- 7 Y. F. Duan, L. X. Qin, L. W. Shi, G. Tang, *Computational Materials Science*, 2015, **101**, 56-61.
- 8 A. Janotti, D. Segev, C. G. Van de Walle, *Phys. Rev. B*, 2006, **74**, 045202-1-9.
- 9 J. Kaczkowski, *Acta Physica Polonica*, 2012, **121**, 5-6.
- 10 S. H. Wei, A. Zunger, *Phys. Rev. B*, 1999, **60**, 5404-5411.
- 11 J. Serrano, A. Rubio, E. Hernández, A. Muñoz, A. Mujica, *Phys. Rev. B*, 2000, **62**, 16612-16623.
- 12 R. Ahmed, H. Akbarzadeh, Fazal-e-Aleem, *Phy. B*, 2005, **370**, 52-60.
- 13 S. Saib, N. Bouarissa, *Phys. B: Conden. Matt.*, 2007, **387**, 377-382.
- 14 W. X. Feng, S. X. Cui, H. Q. Hu, W. Zhao, *Phys. Status Solidi B*, 2010, **247**, 313-317.
- 15 J. M. Besson, L. Bellaich, K. Kunc, *Phys. Stat. Sol. (b)*, 1996, **198**, 469-474.
